# Supplementary material for: Disease-Modifying Medications in Patients with Rheumatoid Arthritis in the USA: Trends from 2016 to 2021
Source: Springer Nature journal article supplement (doi:10.1007/s40801-024-00416-3), 2024-02-18
Supplement: MOESM1 [file 26747656]

**Title**

Disease-Modifying Medications in Patients with Rheumatoid Arthritis in the United States: Trends from 2016-2021.

Running Header: Trends in DMARD Use in Patients with Rheumatoid Arthritis in the US: 2016-2021.

**Authors**

Samuel K Peasah<sup>1,2</sup> PhD MBA, Elizabeth CS Swart<sup>1</sup> MPH, Yan Huang MS<sup>1</sup>, Sandra L Kane-Gill<sup>2</sup> PharmD MS, Amy L Seybert<sup>2</sup> PharmD, Urvashi Patel<sup>4</sup> PhD MPH, Chronis Manolis<sup>3</sup> RPh, Chester B Good<sup>1,2,3</sup> MD MPH

**Affiliations**

1. Value-based Pharmacy Initiatives, Center for High-Value Health Care, UPMC Health Plan, Pittsburgh, PA, USA
2. School of Pharmacy, University of Pittsburgh, Pittsburgh, PA USA
3. Department of Pharmacy, UPMC Health Plan, Pittsburgh, PA USA
4. Evernorth Research Institute, Cigna Health, St. Louis, MO USA

**Corresponding author**

Samuel K Peasah, PhD, MBA.

Value-based Pharmacy Initiatives, Center for High-Value Health Care, UPMC Health Plan, US Steel Tower, 40<sup>th</sup> floor. 600 Grant Street. Pittsburgh, PA 15219, USA. Email: [Peasahsk@upmc.edu](mailto:Peasahsk@upmc.edu) Tel. 412-454-5129

## Supplemental table and figures

STable 1: Demographics of new DMARD RA users of RA from 2017-2021

|                           | <b>VARIABLE</b>      | <b>TOTAL<br/>(37,907)</b> | <b>2017<br/>(6,762)</b> | <b>2018<br/>(7,054)</b> | <b>2019<br/>(8,213)</b> | <b>2020<br/>(8,200)</b> | <b>2021<br/>(7,678)</b> |
|---------------------------|----------------------|---------------------------|-------------------------|-------------------------|-------------------------|-------------------------|-------------------------|
| <b>MEAN AGE</b>           | Age<br>(yrs, SD)     | 64.0<br>(13.7)            | 62.3<br>(13.7)          | 63.5<br>(13.8)          | 63.7<br>(13.6)          | 63.8<br>(13.4)          | 66.3<br>(13.9)          |
| <b>AGE GROUP</b>          | Elderly<br>(≥65yrs)  | 54.3                      | 49.2                    | 53.2                    | 53.5                    | 53.5                    | 61.3                    |
|                           | Adults<br>(18-64yrs) | 45.7                      | 50.8                    | 46.8                    | 46.5                    | 46.5                    | 38.7                    |
| <b>SEX</b>                | Male                 | 21.8                      | 22.2                    | 21.2                    | 22.3                    | 21.2                    | 22.2                    |
|                           | Female               | 78.2                      | 77.8                    | 78.8                    | 77.7                    | 78.8                    | 77.8                    |
| <b>RACE</b>               | White                | 70.5                      | 70.9                    | 68.0                    | 70.3                    | 70.7                    | 72.2                    |
|                           | Black                | 12.7                      | 11.7                    | 14.0                    | 13.0                    | 12.6                    | 12.3                    |
|                           | Hispanic             | 14.4                      | 14.7                    | 15.4                    | 14.1                    | 14.3                    | 13.3                    |
|                           | Asian                | 2.5                       | 2.7                     | 2.6                     | 2.6                     | 2.4                     | 2.2                     |
| <b>INSURANCE<br/>TYPE</b> | Commercial           | 36.0                      | 41.8                    | 36.9                    | 35.9                    | 37.2                    | 28.7                    |
|                           | Medicare             | 64.0                      | 58.2                    | 63.1                    | 64.0                    | 62.8                    | 71.3                    |
|                           | EPO                  | 4.7                       | 4.7                     | 4.7                     | 4.9                     | 4.8                     | 4.2                     |
|                           | HMO                  | 23.8                      | 32.5                    | 25.5                    | 22.4                    | 21.1                    | 18.9                    |
|                           | IND                  | 0.6                       | 0.8                     | 0.7                     | 0.6                     | 0.7                     | 0.5                     |
|                           | OTH                  | 42.0                      | 29.7                    | 38.1                    | 42.6                    | 43.7                    | 53.8                    |
|                           | POS                  | 24.3                      | 26.7                    | 25.4                    | 24.7                    | 25.2                    | 19.5                    |
|                           | PPO                  | 4.7                       | 5.5                     | 5.6                     | 4.8                     | 4.4                     | 3.2                     |
| <b>US REGION</b>          | Midwest              | 22.7                      | 29.2                    | 20.1                    | 20.9                    | 21.7                    | 22.5                    |
|                           | Northeast            | 9.9                       | 7.8                     | 9.4                     | 10.4                    | 10.4                    | 11.4                    |
|                           | South                | 48.2                      | 43.0                    | 51.4                    | 49.9                    | 48.5                    | 47.5                    |
|                           | West                 | 19.2                      | 20.0                    | 19.1                    | 18.9                    | 19.4                    | 18.7                    |

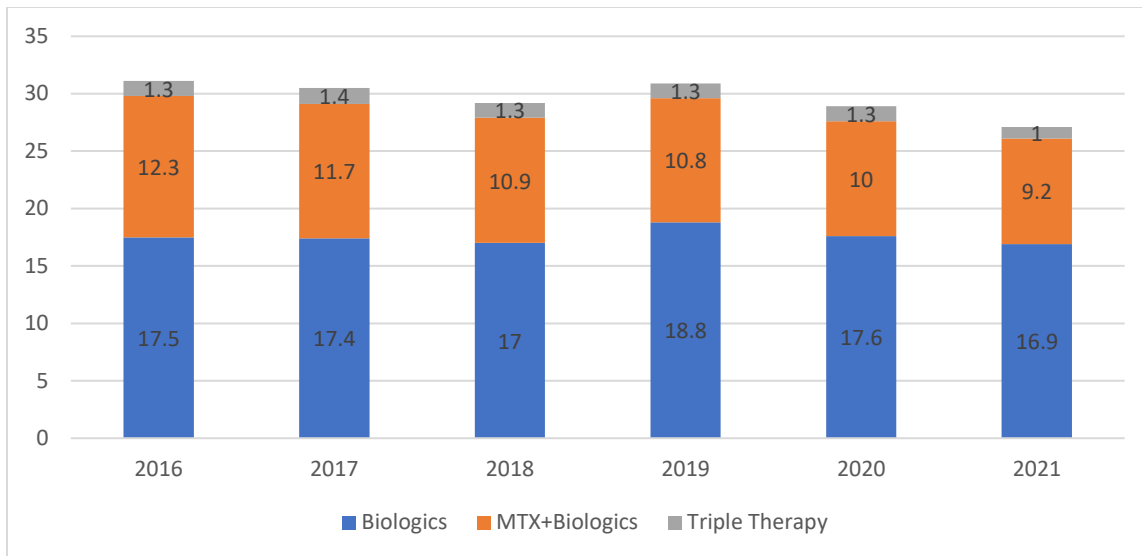

Figure 1: Trends in patients using triple therapy, MTX + Biologics, and Biologics only for prevalence DMARD users.

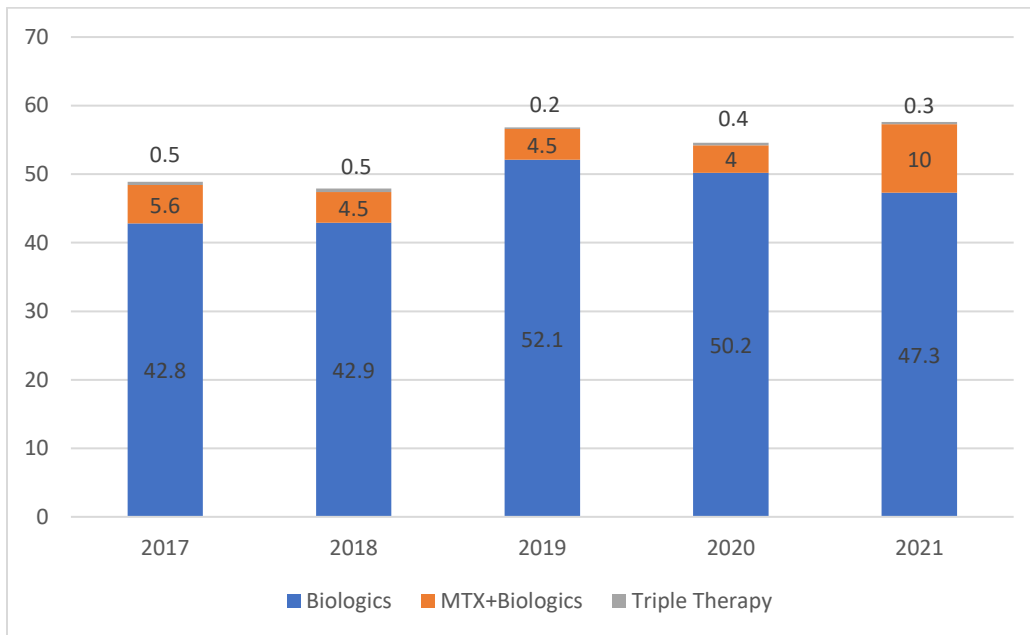

Figure 2: Trends in patients using triple therapy, MTX + Biologics, and Biologics only for new DMARD users.
